# The American Journal of Psychiatry

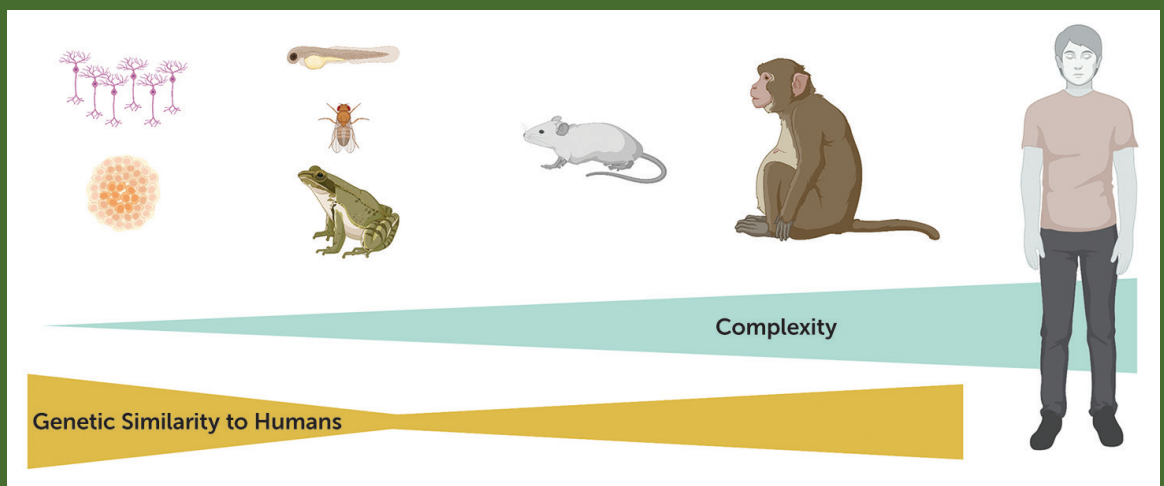

Translational Neuroscience Approaches to Understanding Autism

Lower Availability of Mitochondrial Complex I in  
Anterior Cingulate Cortex in Autism

Polygenic Scores and Onset of Major Mood or Psychotic  
Disorders Among Offspring of Affected Parents

Genetic Associations Between Stress-Related  
Disorders and Autoimmune Disease

Anterior Insula–Associated Social Novelty Recognition:  
Pivotal Roles of a Local Retinoic Acid Cascade  
and Oxytocin Signaling
