# Telepsychiatry is transforming mental healthcare; but with new technology comes new risks.

With data breaches and cyber attacks becoming increasingly common, having the right cyber protection in place is critical. Whether you are in private practice or work within an organization, psychiatrists who maintain confidential patient / employee information have a responsibility to safeguard that data.

**Cyber Suite** through American Professional Agency, Inc., is an endorsement to your professional liability coverage.

It's simple to add with no lengthy forms to fill out.

American Psychiatric Association Endorsed  
Professional Liability Insurance Program



Adding the Cyber Suite endorsement is fast and easy.

Learn more about Cyber Suite at [AmericanProfessional.com/cyber-suite-PRO](http://AmericanProfessional.com/cyber-suite-PRO)  
or call (800) 421-6694 Ext. 2318.

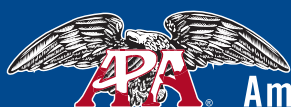

**American Professional Agency**

LEADERS IN PSYCHIATRIC MEDICAL LIABILITY INSURANCE

ENDORSED BY THE

AMERICAN  
PSYCHIATRIC  
ASSOCIATION

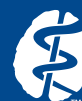

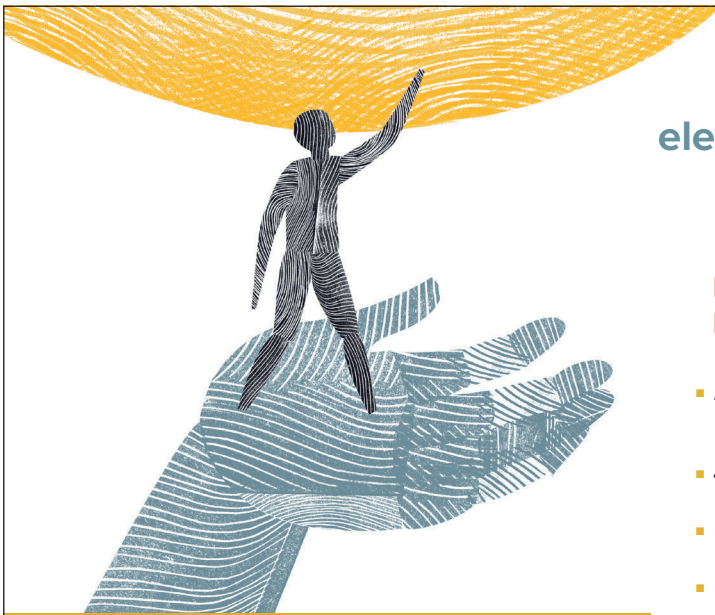

If you're dedicated to elevating mental health care...

**YOU BELONG HERE.**

**No disability evaluations. No benzodiazepines.  
No stimulants. No insurance companies.**

- Appreciation Bonus up to \$35k for professionals newly hired with the State of CA
- 40-hour workweek with flexible schedules, including 4/10s
- Generous paid time off and holiday schedule
- Multiple locations throughout CA
- 401(k) and 457(b) plans (tax defer up to \$45k – \$60k per year)
- Additional 15% stipend (of base salary) for clinicians within an inpatient unit
- Visa sponsorship opportunities
- Paid malpractice insurance, license, and DEA renewal
- State of CA retirement that vests in five years (visit [www.CalPERS.ca.gov](http://www.CalPERS.ca.gov) for retirement formulas)

**PSYCHIATRISTS** | INPATIENT  
OUTPATIENT

**\$285,948 – \$343,596**  
annual salary (Board Certified)

**\$278,616 – \$333,912**  
annual salary (Board Eligible)

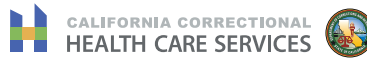

Submit your CV to [CentralizedHiringUnit@cdcr.ca.gov](mailto:CentralizedHiringUnit@cdcr.ca.gov)  
or apply online at [www.cchcs.ca.gov](http://www.cchcs.ca.gov).

Salary depending on experience.

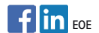

# APA Publishing **Audio Books** Listen anytime, anywhere

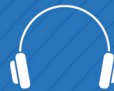

Purchase and listen at [appi.org](http://appi.org)

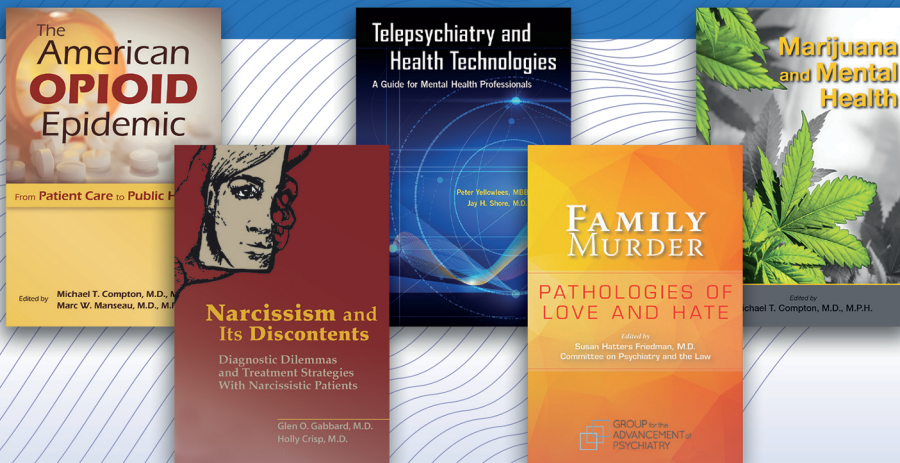

Also available at: Google Podcasts, Apple Podcasts, Spotify, Stitcher, and YouTube

AMERICAN  
PSYCHIATRIC  
ASSOCIATION  
**PUBLISHING**   
[www.appi.org](http://www.appi.org)  
Email: [appi@psych.org](mailto:appi@psych.org)  
Toll-Free: 1-800-368-5777

## Subscription and Business Information

*The American Journal of Psychiatry*, ISSN 0002-953X, is published monthly by the American Psychiatric Association.

The American Psychiatric Association does not hold itself responsible for statements made in its publications by contributors or advertisers. Unless so stated, material in *The American Journal of Psychiatry* does not reflect the endorsement, official attitude, or position of the American Psychiatric Association or of the Journal's Editorial Board.

Periodicals postage paid at Washington, DC, and additional mailing offices. POSTMASTER: Send address changes to *The American Journal of Psychiatry*, Circulation Department, American Psychiatric Association, 800 Maine Avenue, S.W., Suite 900, Washington, D.C. 20024.

### Editorial Office

*American Journal of Psychiatry*  
American Psychiatric Association  
800 Maine Avenue, S.W., Suite 900  
Washington, D.C. 20024  
E-mail: [ajp@psych.org](mailto:ajp@psych.org)

### Customer Service

Phone: (800) 368-5777 (toll-free)  
E-mail: [appi@psych.org](mailto:appi@psych.org)

### APA Member Subscription Services

Phone: (888) 35-PSYCH (toll-free)

### Subscriptions

Regular and resident-fellow members in the U.S. receive print and online access as a **member benefit**. Subscriptions for non-members start at \$378 per year. Online only subscriptions start at \$342 per year. Go to <https://www.appi.org/ajp> for more information.

Institutional subscriptions are tier priced. For institutional site license or pricing information, contact (202) 559-3729 or [institutions@psych.org](mailto:institutions@psych.org).

*Additional subscription options, including single issues and student rates*  
Contact Customer Service

### Advertising

*Pharmaceutical Print and Online Advertising*  
Frank Cox, Kathleen Harrison, Tim Wolfinger  
Pharmaceutical Media, Inc.  
30 East 33rd Street  
New York, NY 10016  
Phone: (212) 904-0379  
E-mail: [twolfinger@pminy.com](mailto:twolfinger@pminy.com)

*Nonpharmaceutical and Online Sales*  
Eamon Wood  
Pharmaceutical Media, Inc.  
E-mail: [ewood@pminy.com](mailto:ewood@pminy.com)  
(see address and phone above).

### Permissions and Reprints

Material published in the journals of the American Psychiatric Association and American Psychiatric Association Publishing is protected by copyright and all rights are reserved. Material may not be reproduced in any form or by any means without written permission from the copyright owner. For permission to reproduce material published by APA, please visit <http://www.appi.org/customer-service/permissions> for more information. Permission can also be secured through the Copyright Clearance Center ([www.copyright.com](http://www.copyright.com)).

APA does not require that permission be obtained for the photocopying of isolated articles for nonprofit classroom or library reserve use; all fees associated with such permission are waived. This consent does not extend to other kinds of copying, such as copying for general distribution, for advertising or promotional purposes, for creating new collective works, or for resale. Requests for commercial distribution and bulk reprints should be directed to (202) 609-7075.

Indexed in Abstracts for Social Workers, Academic Abstracts, Biological Abstracts, Chemical Abstracts, Chicago Psychoanalytic Literature Index, Cumulative Index to Nursing Literature, Excerpta Medica, Hospital Literature Index, Index Medicus, International Nursing Index, Nutrition Abstracts, Psychological Abstracts, Science Citation Index, Social Science Source, and Social Sciences Index.

Pages are produced by TNQ Technologies (Chennai, India) effective with Volume 179, Number 3, March 2022, and printed by Sheridan NH (Hanover, NH) on acid-free paper effective with Volume 169, Number 1, January 2012.

© 2023 American Psychiatric Association.

# ▶ PODCASTS from APA Publishing

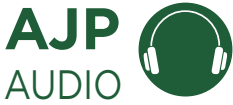

## AJP Audio

Host: Aaron van Dorn

Each episode features an in-depth interview with authors featured in that month's issue of *The American Journal of Psychiatry*.

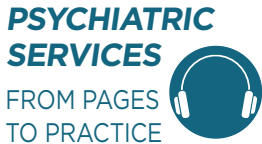

## Psychiatric Services From Pages to Practice

Hosts: Lisa Dixon, M.D., M.P.H., Editor, *Psychiatric Services*, and Josh Berezin, M.D., M.S.

Learn about the latest mental health services research published in *Psychiatric Services* and why it is relevant. Topics include community-based treatment programs, collaborative care, evidence-based treatment and service delivery, criminal and social justice, policy analysis, and more.

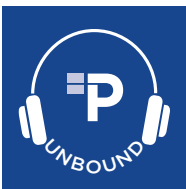

## Psychiatry Unbound

Host: Laura Roberts, M.D., M.A., Editor-in-Chief, APA Publishing Books

APA Publishing's Books podcast offers the opportunity to hear the voices behind the most prominent psychiatric scholarship in the field today. Learn about important topics in the field of psychiatry and see how our authors are making an impact in clinical settings throughout the world.

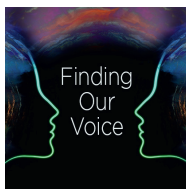

## Finding Our Voice

Host: Sanya Virani, MBBS, MPH

*Finding Our Voice* brings the viewpoints and opinions of the next generation of psychiatrists—including residents, fellows, and early career psychiatrists—to the forefront. Topics covered include systemic racism and social determinants.

Subscribe Today!

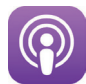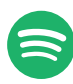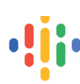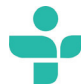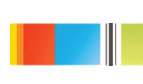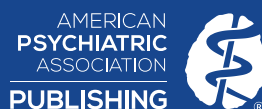

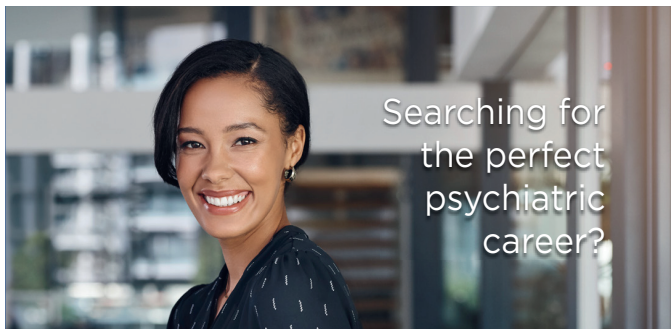

Searching for  
the perfect  
psychiatric  
career?

## Let APA JobCentral help!

### Manage Your Career

- Browse hundreds of active job listings!
- Create an account to save jobs, store multiple resumes and cover letters and communicate with employers through our internal messaging system.
- Set up multiple job alerts specifying your skills, interests and location to receive e-mails when employers post jobs that match your criteria.

### Recruit for Open Positions

- Post your job in front of thousands of highly qualified psychiatrists.
- Cross promote your job listing in Psychiatric News.
- Search the anonymous resume database to find your ideal candidate.

[jobs.psychiatry.org](http://jobs.psychiatry.org)

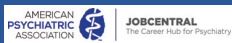

AH2203

PSYCHIATRIC  
NEWS

BRIEF

## Enable Psychiatric News Brief

With the American Psychiatric Association's new flash briefing, *Psychiatric News Brief*, you can now listen to synopses of curated articles from *Psychiatric News*. Simply enable this skill and you can listen anytime you choose throughout your day by just saying "Alexa, what's my flash briefing" or "Alexa, tell me what's new".

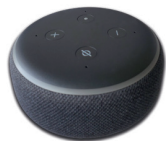

Flash briefing is a customizable Amazon skill that includes updates from your favorite content services. When you say, "Alexa, what's my flash briefing?" or "Alexa, what's the news," you'll hear updates from any organization that you have enabled.

Go to [psychnews.psychiatryonline.org/alexa](http://psychnews.psychiatryonline.org/alexa) to sign up now!

AMERICAN  
PSYCHIATRIC  
ASSOCIATION  
PUBLISHING

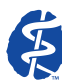

[www.appi.org](http://www.appi.org)  
Email: [appi@psych.org](mailto:appi@psych.org)  
Phone: 1-800-368-5777

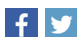

Parkland Medical Center

Portsmouth  
Regional  
Hospital

Frisbie Memorial Hospital  
*It's about People. Technology. Trust.*

## HOSPITAL EMPLOYED PSYCHIATRY OPPORTUNITIES IN NEW HAMPSHIRE

Portsmouth Regional Hospital, Parkland Medical Center and Frisbie Memorial Hospital are seeking BC/BE Psychiatrists to join their HCA employed practices in New Hampshire. HCA is one of the nation's leading providers of healthcare services. You will work with a supportive and energetic multi-disciplinary team that employs creativity and compassion in their work with patients, families and caregivers.

### Opportunities Available:

- **GME Consult Liaison**—Portsmouth, NH— Clinical/ Teaching Opportunity; Serve as a consult liaison for Portsmouth Regional Hospital (PRH) Emergency Department as well as teaching psychiatry residents on CL/ED rotation at PRH. Available academic appointment at Tufts University. Monday-Friday work schedule, **no weekend call**.
- **Psychiatrist** – Derry NH –Hospitalist for Parkland Medical Center's Behavioral Health Unit, as well as covering the Partial Hospitalization Program and Eating Disorders Treatment Center. *Flexible shifts; generous hourly pay; and flexible call rotation.*
- **Adult & Geriatric Psychiatrist** – Rochester, NH – Adult and Geriatric Psychiatric for Frisbie Memorial Hospital's employed practice. Can provide both inpatient and outpatient care. Geriatric fellowship preferred: ECT therapy a plus! Mon-Fri work schedule; and flexible call rotation.

### Qualified Candidates:

- Completion of an accredited residency program in Psychiatry
- Certified / Re-Certified (if applicable) by the American Board of Psychiatry
- Excellent interpersonal and communication skills

### Incentive/Benefits Package:

- Competitive compensation with occurrence-based malpractice with tail coverage
- Comprehensive benefits package including commencement bonus; CME monies and time
- Faculty appointment to Tufts University School of Medicine is available

**Portsmouth Regional Hospital** is a 220-bed acute care facility with a Level II Trauma Center; 24/7 full-service ER; dedicated Hospitalist and Intensivist program. The inpatient psychiatric unit is a 30-beds, this includes 16 involuntary beds. Portsmouth Regional is home to our Psychiatry Residency Program which was initiated in summer 2021.

To learn more about us and to share your professional interests, please contact Char Plotycia, Physician Recruiter, at 913-558-2469 or [charlene.plotycia@hcahealthcare.com](mailto:charlene.plotycia@hcahealthcare.com).

# THE AMERICAN PSYCHIATRIC ASSOCIATION

800 Maine Avenue, S.W., Suite 900, Washington, D.C. 20024

(888) 357-7924 (toll-free inside the U.S. and Canada)

web site: [www.psychiatry.org](http://www.psychiatry.org) • e-mail: [apa@psych.org](mailto:apa@psych.org)

## Chairpersons of Councils, Committees, and Task Forces

### Standing Committees

|                             |                              |
|-----------------------------|------------------------------|
| <b>Bylaws</b>               | Edward R. Herman, J.D., M.D. |
| <b>Elections</b>            | Josepha A. Cheong, M.D.      |
| <b>Ethics</b>               | Charles Dike, M.D.           |
| <b>Finance and Budget</b>   | Ann T. Sullivan, M.D.        |
| <i>Audit</i>                | Richard F. Summers, M.D.     |
| <i>Investment Oversight</i> | Steven S. Sharfstein, M.D.   |
| <b>Joint Reference</b>      | Petros Levounis, M.D., M.A.  |
| <b>Membership</b>           | Gail Robinson, M.D.          |
| <b>Nominating</b>           | Vivian B. Pender, M.D.       |
| <b>Tellers</b>              | Mariam F. Aboukar, D.O.      |

### Non-Standing Committee

|                             |                               |
|-----------------------------|-------------------------------|
| <b>Conflict of Interest</b> | Sandra M. DeJong, M.D., M.Sc. |
|-----------------------------|-------------------------------|

### Councils

#### Council on Addiction Psychiatry

Smita Das, M.D., M.P.H., Ph.D.

#### Council on Advocacy and Government Relations

Katherine G. Kennedy, M.D.

*Advocacy and Litigation Funding*

Patrick Aquino, M.D.

#### Council on Children, Adolescents, and Their Families

Anish R. Dube, M.D., M.P.H.

*Women's Mental Health*

Ludmila B. De Faria, M.D.

#### Council on Communications

Howard Liu, M.D., M.B.A.

#### Council on Consultation-Liaison Psychiatry

Maria L. Tiamson-Kassab, M.D.

#### Council on Geriatric Psychiatry

Maria D. Llorente, M.D.

#### Council on Healthcare Systems and Financing

Robert L. Trestman, M.D., Ph.D.

*Integrated Care*

Benjamin G. Druss, M.D.

*RBRVS, Codes and Reimbursement*

Jeremy S. Musher, M.D.

*Reimbursement for Psychiatric Care*

Brian Hepburn, M.D.

*Telepsychiatry*

Shabana Khan, M.D.

#### Council on International Psychiatry and Global Health

Pamela Collins, M.D., M.P.H.

#### Council on Medical Education and Lifelong Learning

Art Walaszek, M.D.

*Innovation*

Steven Chan, M.D., M.B.A.

*Scientific Program*

Eric Williams, M.D.

*Scientific Program—Mental Health Services Conference*

*(Oct. to Oct. tenure)*

John Santopietro, M.D.

*Vestermark Award Committee*

Donna M. Sudak, M.D.

*Well-being and Burnout*

Uchenna Okoye, M.D., M.P.H.

#### Council on Minority Mental Health and Health Disparities

Walter Wilson, Jr., M.D.

#### Council on Psychiatry and Law

Richard Martinez, M.D., M.H.

*Judicial Action*

Reena Kapoor, M.D.

#### Council on Quality Care

Carol L. Alter, M.D.

*Mental Health Information Technology*

John Torous, M.D.

*Quality and Performance Measurement*

David S. Kroll, M.D.

*Practice Guidelines*

Daniel J. Anzia, M.D.

#### Council on Research

Jonathan E. Alpert, M.D., Ph.D.

*Climate Change and Mental Health*

Elizabeth Haase, M.D.

*Psychiatric Dimensions of Disasters*

Joshua C. Morganstein, M.D.

# Go Online

Visit [ajp.psychiatryonline.org](http://ajp.psychiatryonline.org) for these features!

## AJP in Advance

*Discover the latest research advances before they appear in print*

### **Double-Blind Placebo-Controlled Study of Memantine in Trichotillomania and Skin-Picking Disorder**

Trichotillomania and skin-picking disorder are common psychiatric disorders that lack clearly effective treatments. This study examined memantine, a generic medication that may modulate glutamate in the brain, compared to placebo. The findings suggest that memantine may be an effective treatment for reducing both hair-pulling and skin-picking behavior.

## AJP Audio and Video

In the April 2023 episode of our AJP Audio podcast, David G. Amaral, Ph.D., discusses the use of animal models and other forms of translational neuroscience in the investigation of autism spectrum disorder (Veenstra-VanderWeele et al., p. 265).

In an issue highlights video, AJP Deputy Editor Danny Pine discusses the articles "Lower Availability of Mitochondrial Complex I in Anterior Cingulate Cortex in Autism: A Positron Emission Tomography Study" (Kato et al., p. 277) and "Polygenic Scores and Onset of Major Mood or Psychotic Disorders Among Offspring of Affected Parents" (Zwicker et al., p. 285).

## AJP CME

You can earn CME credits by reading articles in *The American Journal of Psychiatry*. Three articles in this issue form a short course that consists of reading the article and answering three multiple-choice questions with a single correct answer for up to 1 AMA PRA Category 1 Credit™ each. Credit is issued only to subscribers of the online AJP CME Course Program.

See the list below for articles in this month's issue that are the subject of a CME quiz.

### **In this issue**

---

Polygenic Scores and Onset of Major Mood or Psychotic Disorders Among Offspring of Affected Parents (Zwicker et al., p. 285)

---

Genetic Associations Between Stress-Related Disorders and Autoimmune Disease (Zeng et al., p. 294)

---

Anterior Insula-Associated Social Novelty Recognition: Pivotal Roles of a Local Retinoic Acid Cascade and Oxytocin Signaling (Kim et al., p. 305)

---

@APAPubJournals

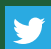

Psychiatry Online

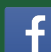

AMERICAN  
PSYCHIATRIC  
ASSOCIATION  
PUBLISHING

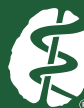

[www.appi.org](http://www.appi.org)  
1-800-368-5777  
[appi@psych.org](mailto:appi@psych.org)

# Considering Going Deep with TMS for Your Practice? Here is Why You Should Choose MagVenture®

Are you a mental health professional who is considering TMS treatment options for your Practice? MagVenture provides proven solutions to treat major depressive disorder as well as OCD, solutions that help practitioners improve patients' lives and benefit their practice as well. You have choices when it comes to TMS systems. So why choose us?

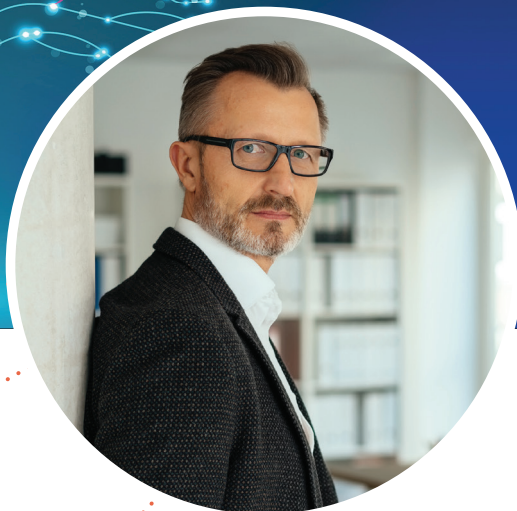

## Ease of Use.

Switch coils easily and quickly, with no tools.

## Value.

No "pay-per-use" fees and low cost of operation. Start to recoup your investment immediately.

## Specificity.

MagVenture systems exhibit a 6.4-fold lower seizure rate compared to systems with helmet-style coils.<sup>3</sup>

## Flexibility.

The MV system is modular and grows with you. Our liquid-cooled coils allow you to treat patients back-to-back all day long.

## Reputation and Efficacy.

More of our machines are installed globally than any other manufacturer. The foremost TMS experts and researchers use MagVenture systems.

## Patient Satisfaction.

Our systems are quiet<sup>1</sup>, comfortable<sup>2</sup>, and less confining for the patient.

## Support.

We have teams in three US locations to support you.

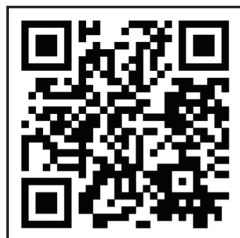

Find out what hundreds of practitioners already know about the benefits of working with MagVenture. Contact us today and let's talk about how we can help you get your patients well while providing value for your practice on day 1. **Go deep with MagVenture.**

MagVenture.com

**MagVenture** TMS Therapy  
Stimulating mental health.

1. S.C. Dhamne et al., *Brain Stimulation* (2014); 7(3): 432-434  
2. A.V. Peterchev et al. *Brain Stimulation* (2017); 10(1): 99-105  
3. J.J. Taylor, et al., *Brain Stimulation* 14 (2021) 965e973
